# Supplementary material for: Decoding protein dynamicity in DNA ligase activity through deep learning-based structural ensembles
Source: PubMed Central journal article supplement (PMC11581005; doi:10.1101/2024.11.07.622521), 2024-11-07
Supplement: NIHPP2024.11.07.622521v1-supplement-1.pdf [file NIHPP2024.11.07.622521v1-supplement-1.pdf]

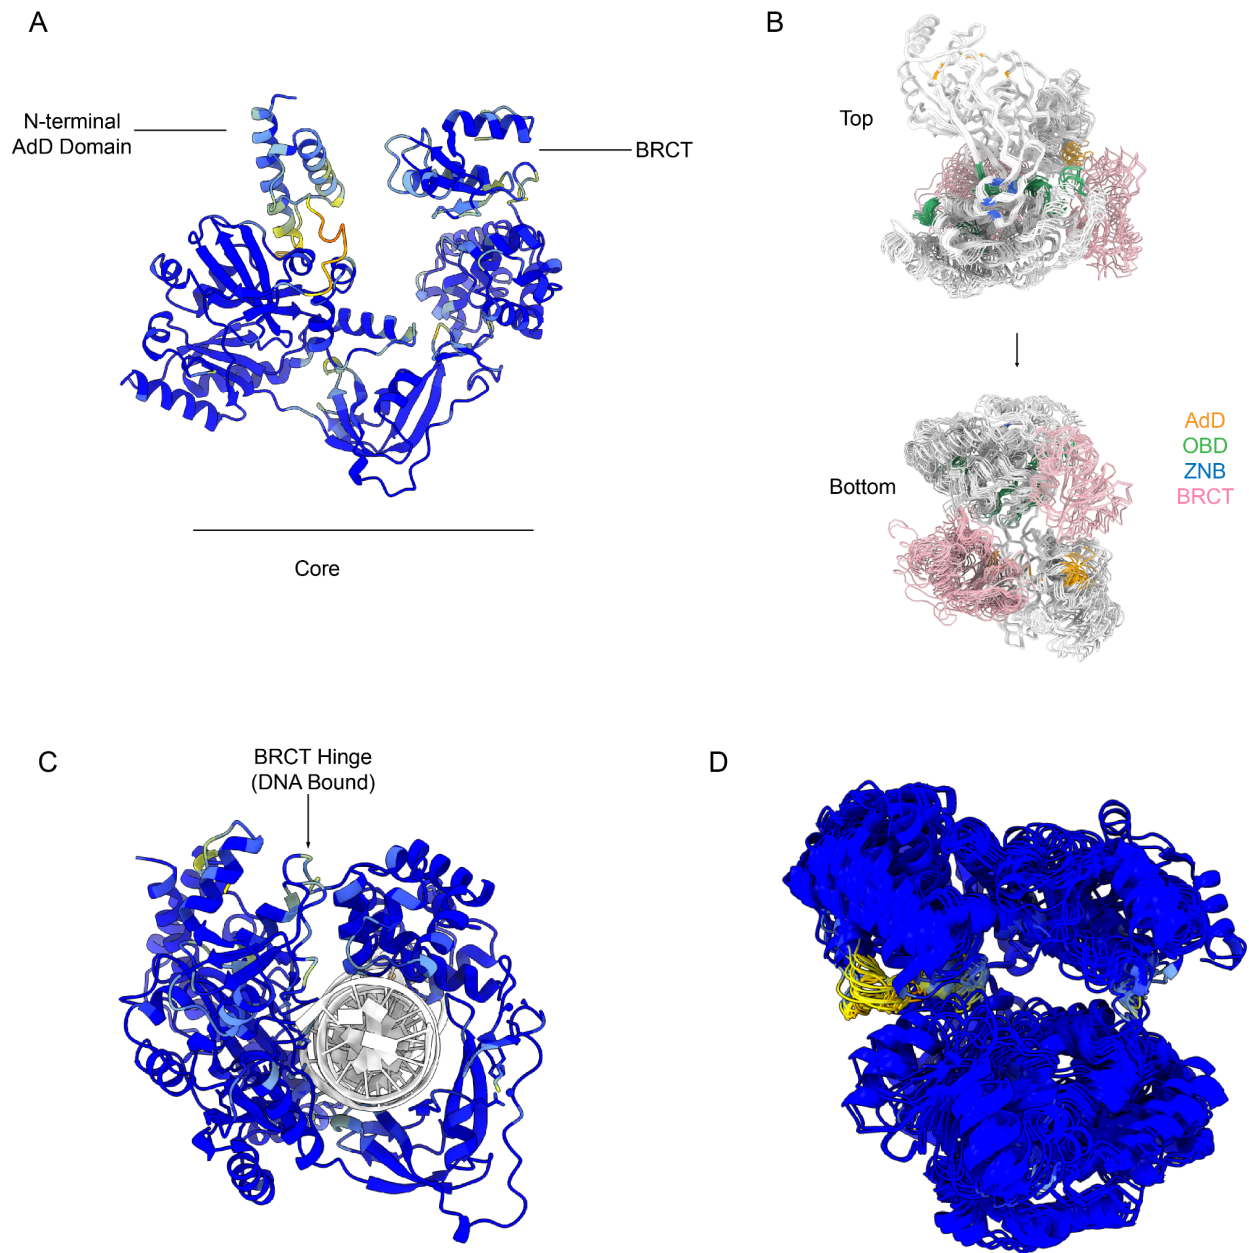

**Figure S1: Domain-Specific Confidence and Structural Flexibility in Taq Ligase.** (A) Confidence score across domains. (B) Conformational flexibility highlighted by superimposing the ensemble. (C) Hinge confidence in DNA bound form. (D) High confidence in the core domain across the ensemble.
